# Supplementary material for: Balancing Agent Retention and Waiting Time in Service Platforms
Source: Atypon-hosted journal article supplement (doi:10.1287/opre.2022.2418), 2023-01-25
Supplement: opre.2022.2418.sm1.pdf [file opre.2022.2418.sm1.pdf]

# Online Supplement for "Balancing Agent Retention and Waiting Time in Service Platforms"

## A Instrumental variable estimation using the ratio of outbound calls to incoming quotes as IV

The estimation with IVs is implemented through a logistic regression with a control function. To construct the effective service capacity measure, the time period comprised between the quote arrival and elapsed time of the call ( $w_{it}$ ) is divided into one-hour length intervals. For each interval, a measure of congestion was calculated by taking the ratio of the outbound calls in that interval and the number of new quotes arriving to the system. The higher the value of this metric, the higher the capacity of the system to respond to the quotes in that period. An average is taken across the time intervals to construct the instrumental variable  $Z_{it}$ , named *Effective capacity*. To implement the IV via a control function, the first step is a linear regression of  $w_{it}$  on  $X_{it}$  and  $Z_{it}$ . A function of the residual of this regression is added as an additional covariate to the logistic model (equation 2) to account for a potential correlation between  $\epsilon_{it}$  and  $w_{it}$ . The main results use a quadratic polynomial of the residual to specify the control function. A linear specification yields similar results.

To validate the relevance of the IV, Table A1 shows the results of the first step regression, which reveals a negative and highly significant coefficient for the Effective capacity. Hence, our measure of effective capacity is a strong predictor of waiting time: as capacity increases, waiting times are reduced.

For the IV to be exogenous, it must be unrelated to unobserved factors that affect a customer's interest in answering the call. To validate this, we first ran a logistic regression to predict whether a customer would answer the first call based on observable variables related to the quote and customer characteristics. As we have presented before, these variables are effective to discriminate whether a customer will answer the phone, with the bottom and top 5% predicted probabilities ranging from 0.37 to 0.67; hence, this predicted probability is a reasonable proxy of the customers likelihood of answering the call.

Then, we regressed this prediction on the effective capacity; the goal is to assess whether customers with a higher propensity to answer the phone (based on observable characteristics) tend to arrive at periods of lower congestion, as the mechanism presented in the reviewer's comment would suggest. Table A2 shows the estimation results of this regression; the first column includes a linear measure of the effective capacity, whereas the second column includes a quadratic term to capture potential non-linear effects. In all cases, the estimates suggest a very weak association between between the predicted answering probability and the effective capacity, with an R-square which is essentially zero (the linear term is statistically significant due to the large sample size, but with a very small magnitude).

Overall, our analysis suggests that customers and quotes that tend to have a higher probability of answering the phone do not arrive in a systematic pattern that is associated with the level of effective service capacity of the system, thereby providing evidence that: (i) the platform does not adapt service capacity in anticipation of the arrivals of customer which are more likely to purchase; (ii) hence the ratio of outbound calls to incoming quotes is exogenous and can be used as a

valid IV.

| (1)                |           |          |
|--------------------|-----------|----------|
| Wait time          |           |          |
| Effective capacity | -1.394*** | (0.0904) |
| DayWeekQuote_0     | -0.126    | (1.638)  |
| DayWeekQuote_1     | -1.877    | (1.279)  |
| DayWeekQuote_2     | -4.153**  | (1.332)  |
| DayWeekQuote_3     | -4.190**  | (1.315)  |
| DayWeekQuote_4     | -4.505*** | (1.315)  |
| DayWeekQuote_5     | -2.224    | (1.291)  |
| DayWeekQuote_6     | 0         | (.)      |
| HourQuote_0        | 598.4***  | (60.79)  |
| HourQuote_1        | 558.4***  | (60.80)  |
| HourQuote_2        | 511.9***  | (60.83)  |
| HourQuote_3        | 467.6***  | (60.89)  |
| HourQuote_4        | 392.5***  | (61.05)  |
| HourQuote_5        | 338.3***  | (60.95)  |
| HourQuote_6        | 269.4***  | (60.87)  |
| HourQuote_7        | 192.5**   | (60.75)  |
| HourQuote_8        | 122.9*    | (60.70)  |
| HourQuote_9        | 75.90     | (60.69)  |
| HourQuote_10       | 70.00     | (60.69)  |
| HourQuote_11       | 71.21     | (60.69)  |
| HourQuote_12       | 72.84     | (60.69)  |
| HourQuote_13       | 72.96     | (60.69)  |
| HourQuote_14       | 75.09     | (60.69)  |
| HourQuote_15       | 77.69     | (60.69)  |
| HourQuote_16       | 68.08     | (60.69)  |
| HourQuote_17       | 63.25     | (60.69)  |
| HourQuote_18       | 59.55     | (60.69)  |
| HourQuote_19       | 55.17     | (60.70)  |
| HourQuote_20       | 49.71     | (60.70)  |
| HourQuote_21       | 43.66     | (60.79)  |
| HourQuote_22       | 0         | (.)      |
| HourQuote_23       | 0         | (.)      |
| HourQuote_24       | 0         | (.)      |
| Google searches    | -0.0318   | (0.0241) |
| Observations       | 65931     |          |
| $R^2$              | 0.611     |          |

Standard errors in parentheses

\*  $p < 0.05$ , \*\*  $p < 0.01$ , \*\*\*  $p < 0.001$

Table A1: Regression of waiting time to first call attempt

|                    | (1)          |             | (2)          |              |
|--------------------|--------------|-------------|--------------|--------------|
|                    | Prob(Answer) |             | Prob(Answer) |              |
| Effective capacity | -0.000259**  | (0.0000804) | -0.0000835   | (0.000175)   |
| Effective cap. Sq. |              |             | -0.00000492  | (0.00000436) |
| Constant           | 0.575***     | (0.000685)  | 0.574***     | (0.00104)    |
| Observations       | 65929        |             | 65929        |              |
| $R^2$              | 0.000        |             | 0.000        |              |

Standard errors in parentheses

\*  $p < 0.05$ , \*\*  $p < 0.01$ , \*\*\*  $p < 0.001$

Table A2: Regression of the probability of answering the phone on the first call attempt

## B Additional estimation results

|                                                    | Norm. Workload       |             | Experience (Quotes) |             |
|----------------------------------------------------|----------------------|-------------|---------------------|-------------|
| <b>Time since quote arrival ( <math>w</math> )</b> |                      |             |                     |             |
| $w \leq 4[m]$                                      | 0.549***             | (0.0898)    | 0.516**             | (0.168)     |
| $4[m] < w \leq 5[m]$                               | 0.470***             | (0.0996)    | 0.546**             | (0.184)     |
| $5[m] < w \leq 6[m]$                               | 0.326**              | (0.124)     | 0.280               | (0.234)     |
| $6[m] < w \leq 10[m]$                              | 0.530***             | (0.118)     | 0.565**             | (0.219)     |
| $10[m] < w \leq 20[m]$                             | 0.348*               | (0.138)     | 0.208               | (0.273)     |
| $20[m] < w \leq 40[m]$                             | 0.229                | (0.159)     | 0.217               | (0.299)     |
| $40[m] < w \leq 60[m]$                             | 0.177                | (0.199)     | -0.731              | (0.488)     |
| $60[m] < w \leq 80[m]$                             | -0.0540              | (0.118)     | -0.389 <sup>+</sup> | (0.216)     |
| $80[m] < w \leq 120[m]$                            | -0.139               | (0.167)     | -0.589 <sup>+</sup> | (0.326)     |
| <b>Agent experience ( <math>K</math> )</b>         |                      |             |                     |             |
| $K \leq 4[weeks]$                                  | 0.138                | (0.113)     |                     |             |
| $K \leq 8[weeks]$                                  | 0.0143               | (0.107)     |                     |             |
| $K \leq 12[weeks]$                                 | -0.0579              | (0.113)     |                     |             |
| $K \leq 16[weeks]$                                 | 0.105                | (0.113)     |                     |             |
| $K \leq 20[weeks]$                                 | 0.0233               | (0.103)     |                     |             |
| $K \leq 26[weeks]$                                 | 0.00681              | (0.0906)    |                     |             |
| Experience (quotes)                                |                      |             | -0.000458           | (0.000321)  |
| Experience sq. (quotes)                            |                      |             | 4.91e-08            | (7.75e-08)  |
| Customer tenure                                    | -0.0000342           | (0.0000380) | -0.0000608          | (0.0000669) |
| Male                                               | -0.0722 <sup>+</sup> | (0.0418)    | -0.0422             | (0.0741)    |
| Answer rate                                        | 0.0906***            | (0.00291)   | 0.0914***           | (0.00517)   |
| Blog                                               | 0.143                | (0.307)     | -0.707              | (0.760)     |
| Direct                                             | 0.771***             | (0.149)     | 0.594*              | (0.245)     |
| Display                                            | -0.515               | (0.484)     | 0.0199              | (0.653)     |
| Email                                              | -0.549***            | (0.159)     | -0.817**            | (0.266)     |
| Organic Search                                     | 0.665***             | (0.148)     | 0.689**             | (0.244)     |
| Other                                              | 1.103***             | (0.235)     | 0.908*              | (0.413)     |
| Paid Search                                        | 0.690***             | (0.138)     | 0.445 <sup>+</sup>  | (0.227)     |
| Referral                                           | 0.774***             | (0.206)     | 0.432               | (0.417)     |
| Second call                                        | -0.00150             | (0.105)     | 0.278               | (0.193)     |
| Google searches                                    | 0.00539**            | (0.00209)   | -0.00201            | (0.00369)   |
| Price Index (min)                                  | -0.992***            | (0.0891)    | -1.213***           | (0.158)     |
| Workload ( $L$ )                                   |                      |             | -0.00674            | (0.00689)   |
| Workload sq.( $L^2$ )                              |                      |             | 0.0000503           | (0.0000758) |
| Normalized workload                                | -0.00852             | (0.0108)    |                     |             |
| Normalized workload sq.                            | 0.000223             | (0.000372)  |                     |             |
| Constant                                           | -4.647***            | (1.191)     | -5.612***           | (1.692)     |
| Observations                                       | 31563                |             | 10762               |             |

Standard errors in parentheses

<sup>+</sup>  $p < 0.10$ , \*  $p < 0.05$ , \*\*  $p < 0.01$ , \*\*\*  $p < 0.001$

Table A3: Estimation results of the conversion model. Table shows estimated parameters of the logit model defined by equation (3) with alternative metrics of workload (cumulative workload) and agent experience (number of quotes), using the sub-sample of quotes that were contacted in the first and second calls.

|                                                    | Min H Residual |             | Mean H Residual |             | No Price     |             |
|----------------------------------------------------|----------------|-------------|-----------------|-------------|--------------|-------------|
| <b>Time since quote arrival ( <math>w</math> )</b> |                |             |                 |             |              |             |
| $w \leq 4[m]$                                      | 0.375***       | (0.0294)    | 0.375***        | (0.0294)    | 0.374***     | (0.0294)    |
| $4[m] < w \leq 5[m]$                               | 0.215***       | (0.0336)    | 0.215***        | (0.0336)    | 0.215***     | (0.0335)    |
| $5[m] < w \leq 6[m]$                               | 0.136**        | (0.0427)    | 0.136**         | (0.0427)    | 0.134**      | (0.0427)    |
| $6[m] < w \leq 10[m]$                              | -0.0691        | (0.0403)    | -0.0698         | (0.0403)    | -0.0703      | (0.0402)    |
| $10[m] < w \leq 20[m]$                             | -0.160***      | (0.0461)    | -0.159***       | (0.0461)    | -0.159***    | (0.0461)    |
| $20[m] < w \leq 40[m]$                             | -0.183***      | (0.0526)    | -0.183***       | (0.0526)    | -0.182***    | (0.0526)    |
| $40[m] < w \leq 60[m]$                             | -0.259***      | (0.0655)    | -0.259***       | (0.0655)    | -0.258***    | (0.0655)    |
| $60[m] < w \leq 80[m]$                             | 0.0381         | (0.0738)    | 0.0387          | (0.0738)    | 0.0365       | (0.0738)    |
| $80[m] < w \leq 120[m]$                            | -0.0544        | (0.0639)    | -0.0536         | (0.0639)    | -0.0516      | (0.0639)    |
| Customer tenure                                    | -0.000102***   | (0.0000156) | -0.000102***    | (0.0000156) | -0.000106*** | (0.0000156) |
| Male                                               | -0.0140        | (0.0170)    | -0.0144         | (0.0170)    | -0.0231      | (0.0169)    |
| Answer rate                                        | -0.0696***     | (0.00155)   | -0.0695***      | (0.00155)   | -0.0693***   | (0.00155)   |
| Blog                                               | 0.0224         | (0.110)     | 0.0226          | (0.110)     | 0.0137       | (0.110)     |
| Direct                                             | -0.0840        | (0.0528)    | -0.0853         | (0.0528)    | -0.0926      | (0.0528)    |
| Display                                            | 0.0167         | (0.146)     | 0.0156          | (0.146)     | 0.0125       | (0.146)     |
| Email                                              | -0.0349        | (0.0509)    | -0.0350         | (0.0509)    | -0.0363      | (0.0509)    |
| Organic Search                                     | -0.0294        | (0.0521)    | -0.0302         | (0.0521)    | -0.0349      | (0.0521)    |
| Other                                              | 0.201*         | (0.0891)    | 0.201*          | (0.0891)    | 0.199*       | (0.0891)    |
| Paid Search                                        | -0.0110        | (0.0472)    | -0.0115         | (0.0472)    | -0.0158      | (0.0472)    |
| Referral                                           | -0.150*        | (0.0754)    | -0.149*         | (0.0755)    | -0.158*      | (0.0754)    |
| Google searches                                    | 0.00101        | (0.000827)  | 0.000994        | (0.000827)  | 0.00101      | (0.000827)  |
| Price Index (min)                                  | -0.175***      | (0.0338)    |                 |             |              |             |
| Price Index (mean)                                 |                |             | -0.144***       | (0.0347)    |              |             |
| Constant                                           | -0.230         | (0.237)     | -0.184          | (0.236)     | -0.159       | (0.236)     |
| Observations                                       | 66012          |             | 66012           |             | 66034        |             |

Standard errors in parentheses

\*  $p < 0.05$ , \*\*  $p < 0.01$ , \*\*\*  $p < 0.001$

Table A4: Estimation results of the contact model for the first call attempt under the base specification, using mean hedonic regression residuals and without using price in the model. The table shows estimated parameters of the logit model defined by equation (2).

|                                                    | Min H Residual |             | Mean H Residual |             | No Price     |             |
|----------------------------------------------------|----------------|-------------|-----------------|-------------|--------------|-------------|
| <b>Time since Quote Arrival ( <math>w</math> )</b> |                |             |                 |             |              |             |
| $w \leq 4[m]$                                      | -0.483**       | (0.163)     | -0.486**        | (0.163)     | -0.457**     | (0.161)     |
| $4[m] < w \leq 5[m]$                               | -2.416***      | (0.213)     | -2.418***       | (0.213)     | -2.418***    | (0.213)     |
| $5[m] < w \leq 6[m]$                               | -2.182***      | (0.234)     | -2.181***       | (0.234)     | -2.183***    | (0.234)     |
| $6[m] < w \leq 10[m]$                              | -1.381***      | (0.161)     | -1.380***       | (0.161)     | -1.381***    | (0.161)     |
| $10[m] < w \leq 20[m]$                             | -0.326*        | (0.137)     | -0.327*         | (0.137)     | -0.326*      | (0.137)     |
| $20[m] < w \leq 40[m]$                             | 0.706***       | (0.119)     | 0.706***        | (0.119)     | 0.710***     | (0.119)     |
| $40[m] < w \leq 60[m]$                             | 1.169***       | (0.116)     | 1.169***        | (0.116)     | 1.169***     | (0.116)     |
| $60[m] < w \leq 80[m]$                             | 0.184**        | (0.0598)    | 0.184**         | (0.0598)    | 0.185**      | (0.0598)    |
| $80[m] < w \leq 120[m]$                            | 0.0121         | (0.0721)    | 0.0115          | (0.0721)    | 0.0130       | (0.0720)    |
| <b>Time since previous call ( <math>d</math> )</b> |                |             |                 |             |              |             |
| $d \leq 30[m]$                                     | -1.550***      | (0.0874)    | -1.548***       | (0.0873)    | -1.544***    | (0.0873)    |
| $30[m] < d \leq 60[m]$                             | -0.967***      | (0.136)     | -0.968***       | (0.136)     | -0.967***    | (0.135)     |
| $60[m] < d \leq 90[m]$                             | -0.0414        | (0.0690)    | -0.0408         | (0.0690)    | -0.0396      | (0.0689)    |
| $90[m] < d \leq 120[m]$                            | -0.0104        | (0.106)     | -0.00882        | (0.106)     | -0.00895     | (0.106)     |
| Customer tenure                                    | -0.000106***   | (0.0000312) | -0.000107***    | (0.0000312) | -0.000109*** | (0.0000311) |
| Male                                               | 0.00285        | (0.0341)    | 0.000902        | (0.0342)    | -0.00672     | (0.0339)    |
| Answer rate                                        | -0.0636***     | (0.00313)   | -0.0634***      | (0.00312)   | -0.0633***   | (0.00312)   |
| Blog                                               | 0.0281         | (0.215)     | 0.0266          | (0.215)     | 0.0282       | (0.215)     |
| Direct                                             | -0.113         | (0.106)     | -0.116          | (0.106)     | -0.126       | (0.106)     |
| Display                                            | 0.239          | (0.303)     | 0.231           | (0.302)     | 0.223        | (0.302)     |
| Email                                              | -0.0199        | (0.102)     | -0.0214         | (0.102)     | -0.0255      | (0.102)     |
| Organic Search                                     | -0.00909       | (0.105)     | -0.0127         | (0.105)     | -0.0181      | (0.105)     |
| Other                                              | 0.442**        | (0.163)     | 0.445**         | (0.163)     | 0.451**      | (0.162)     |
| Paid Search                                        | 0.0370         | (0.0946)    | 0.0348          | (0.0946)    | 0.0301       | (0.0945)    |
| Referral                                           | 0.0890         | (0.146)     | 0.0882          | (0.146)     | 0.0798       | (0.146)     |
| Google searches                                    | 0.000457       | (0.00165)   | 0.000440        | (0.00165)   | 0.000459     | (0.00165)   |
| Price Index (min)                                  | -0.188**       | (0.0672)    |                 |             |              |             |
| Price Index (mean)                                 |                |             | -0.132          | (0.0693)    |              |             |
| Constant                                           | 0.902          | (1.209)     | 0.904           | (1.210)     | 0.903        | (1.210)     |
| Observations                                       | 20686          |             | 20686           |             | 20692        |             |

Standard errors in parentheses

\*  $p < 0.05$ , \*\*  $p < 0.01$ , \*\*\*  $p < 0.001$

Table A5: Estimation results of the contact model for the second call attempt under the base specification, using mean hedonic regression residuals and without using price in the model. The table shows estimated parameters of the logit model defined by equation (2).

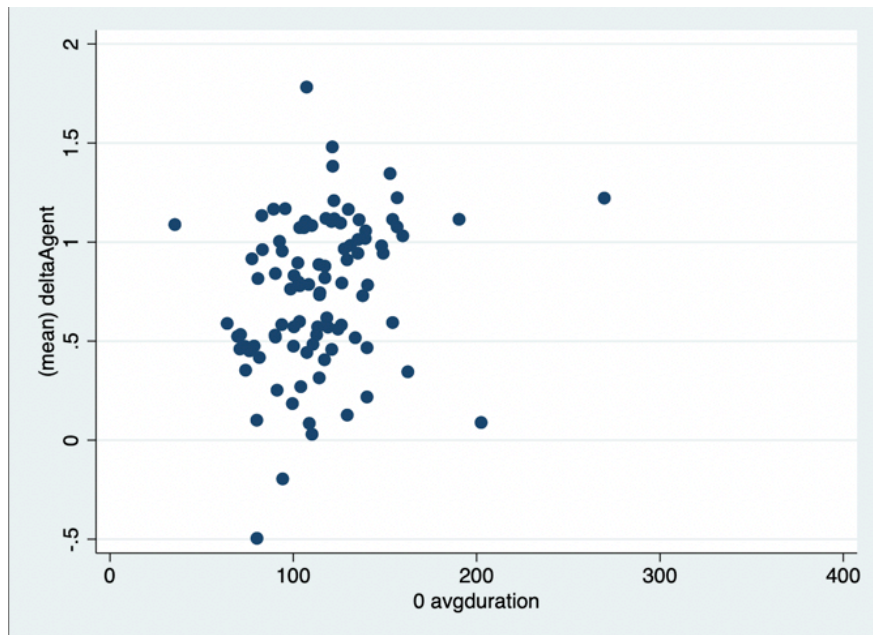

Figure 7: Scatter plot of agent fixed effects (from the conversion model) versus average service time for each agent. The figure suggests that there is no evident association between the skill of an agent (conversion rate) and the time spent to handle calls.

|                                                    | Min H Residual     |             | Mean H Residual    |             | No Price           |             |
|----------------------------------------------------|--------------------|-------------|--------------------|-------------|--------------------|-------------|
| <b>Time since quote arrival ( <math>w</math> )</b> |                    |             |                    |             |                    |             |
| $w \leq 4[m]$                                      | 0.407***           | (0.0801)    | 0.413***           | (0.0800)    | 0.409***           | (0.0800)    |
| $4[m] < w \leq 5[m]$                               | 0.360***           | (0.0885)    | 0.364***           | (0.0884)    | 0.361***           | (0.0883)    |
| $5[m] < w \leq 6[m]$                               | 0.116              | (0.112)     | 0.127              | (0.112)     | 0.125              | (0.112)     |
| $6[m] < w \leq 10[m]$                              | 0.395***           | (0.105)     | 0.394***           | (0.105)     | 0.394***           | (0.105)     |
| $10[m] < w \leq 20[m]$                             | 0.329**            | (0.121)     | 0.340**            | (0.121)     | 0.342**            | (0.121)     |
| $20[m] < w \leq 40[m]$                             | 0.149              | (0.140)     | 0.150              | (0.140)     | 0.148              | (0.140)     |
| $40[m] < w \leq 60[m]$                             | -0.0321            | (0.182)     | -0.0306            | (0.181)     | -0.0272            | (0.181)     |
| $60[m] < w \leq 80[m]$                             | -0.132             | (0.104)     | -0.132             | (0.104)     | -0.134             | (0.104)     |
| $80[m] < w \leq 120[m]$                            | -0.209             | (0.145)     | -0.213             | (0.145)     | -0.214             | (0.145)     |
| <b>Agent experience ( <math>K</math> )</b>         |                    |             |                    |             |                    |             |
| $K \leq 4[weeks]$                                  | 0.174 <sup>+</sup> | (0.0960)    | 0.164 <sup>+</sup> | (0.0959)    | 0.159 <sup>+</sup> | (0.0958)    |
| $K \leq 8[weeks]$                                  | -0.0746            | (0.0922)    | -0.0678            | (0.0921)    | -0.0640            | (0.0920)    |
| $K \leq 12[weeks]$                                 | 0.0134             | (0.0973)    | 0.0126             | (0.0971)    | 0.0144             | (0.0971)    |
| $K \leq 16[weeks]$                                 | 0.104              | (0.0966)    | 0.112              | (0.0965)    | 0.109              | (0.0964)    |
| $K \leq 20[weeks]$                                 | 0.00875            | (0.0920)    | 0.00247            | (0.0919)    | 0.00146            | (0.0919)    |
| $K \leq 26[weeks]$                                 | -0.0114            | (0.0829)    | -0.00831           | (0.0828)    | -0.00702           | (0.0827)    |
| Customer tenure                                    | -0.0000114         | (0.0000337) | -0.0000184         | (0.0000337) | -0.0000298         | (0.0000336) |
| Male                                               | -0.0990**          | (0.0367)    | -0.115**           | (0.0368)    | -0.142***          | (0.0365)    |
| Answer rate                                        | 0.0905***          | (0.00256)   | 0.0912***          | (0.00256)   | 0.0913***          | (0.00255)   |
| Blog                                               | 0.0920             | (0.272)     | 0.0843             | (0.271)     | 0.0846             | (0.271)     |
| Direct                                             | 0.795***           | (0.131)     | 0.771***           | (0.131)     | 0.752***           | (0.131)     |
| Display                                            | -0.176             | (0.413)     | -0.182             | (0.413)     | -0.186             | (0.412)     |
| Email                                              | -0.491***          | (0.139)     | -0.491***          | (0.138)     | -0.490***          | (0.138)     |
| Organic Search                                     | 0.710***           | (0.130)     | 0.700***           | (0.130)     | 0.690***           | (0.130)     |
| Other                                              | 1.135***           | (0.206)     | 1.134***           | (0.206)     | 1.116***           | (0.206)     |
| Paid Search                                        | 0.671***           | (0.121)     | 0.660***           | (0.121)     | 0.648***           | (0.121)     |
| Referral                                           | 0.783***           | (0.173)     | 0.766***           | (0.173)     | 0.735***           | (0.173)     |
| Second call                                        | -0.0305            | (0.0917)    | -0.0254            | (0.0916)    | -0.0273            | (0.0916)    |
| Workload ( $L$ )                                   | -0.00721*          | (0.00353)   | -0.00709*          | (0.00352)   | -0.00716*          | (0.00352)   |
| Workload sq.( $L^2$ )                              | 0.0000559          | (0.0000403) | 0.0000556          | (0.0000402) | 0.0000560          | (0.0000402) |
| Google searches                                    | 0.00450*           | (0.00182)   | 0.00440*           | (0.00181)   | 0.00444*           | (0.00181)   |
| Price Index (min)                                  | -0.902***          | (0.0784)    |                    |             |                    |             |
| Price Index (mean)                                 |                    |             | -0.468***          | (0.0799)    |                    |             |
| Constant                                           | -3.984***          | (1.139)     | -3.675**           | (1.138)     | -3.633**           | (1.138)     |
| Observations                                       | 41110              |             | 41110              |             | 41117              |             |

Standard errors in parentheses

<sup>+</sup>  $p < 0.10$ , \*  $p < 0.05$ , \*\*  $p < 0.01$ , \*\*\*  $p < 0.001$

Table A6: Estimation results of the conversion model. Table shows estimated parameters of the logit model defined by equation (3) using minimum, mean and no residuals of the hedonic regression as a price index, using the sub-sample of quotes that were contacted in the first and second calls and with agent experience measured using the number of weeks since joining the platform.

|                 | Number of quotes |           |
|-----------------|------------------|-----------|
| Google searches | 0.216***         | (0.00621) |
| DayWeekQuote_1  | 40.02***         | (0.413)   |
| DayWeekQuote_2  | 32.18***         | (0.422)   |
| DayWeekQuote_3  | 27.59***         | (0.416)   |
| DayWeekQuote_4  | 28.86***         | (0.418)   |
| DayWeekQuote_5  | 19.66***         | (0.409)   |
| DayWeekQuote_6  | -0.902*          | (0.414)   |
| HourQuote_0     | -52.83***        | (15.65)   |
| HourQuote_1     | -51.83***        | (15.65)   |
| HourQuote_2     | -48.36**         | (15.66)   |
| HourQuote_3     | -41.02**         | (15.68)   |
| HourQuote_4     | -43.63**         | (15.72)   |
| HourQuote_5     | -40.66**         | (15.70)   |
| HourQuote_6     | -35.91*          | (15.68)   |
| HourQuote_7     | -31.80*          | (15.65)   |
| HourQuote_8     | -23.04           | (15.64)   |
| HourQuote_9     | -9.816           | (15.64)   |
| HourQuote_10    | 27.95            | (15.64)   |
| HourQuote_11    | 20.37            | (15.64)   |
| HourQuote_12    | 10.15            | (15.64)   |
| HourQuote_13    | -3.866           | (15.64)   |
| HourQuote_14    | -4.841           | (15.64)   |
| HourQuote_15    | 0.259            | (15.64)   |
| HourQuote_16    | -4.281           | (15.64)   |
| HourQuote_17    | -10.57           | (15.64)   |
| HourQuote_18    | -21.47           | (15.64)   |
| HourQuote_19    | -29.64           | (15.64)   |
| HourQuote_20    | -31.27*          | (15.64)   |
| HourQuote_21    | -31.81*          | (15.67)   |
| HourQuote_22    | 0                | (.)       |
| HourQuote_23    | 0                | (.)       |
| HourQuote_24    | 0                | (.)       |
| MonthQuote_2    | 9.583***         | (0.244)   |
| MonthQuote_3    | 0.305            | (0.226)   |
| MonthQuote_4    | -5.593***        | (0.243)   |
| MonthQuote_5    | -1.637***        | (0.250)   |
| MonthQuote_6    | -4.556***        | (0.250)   |
| MonthQuote_7    | -2.440***        | (0.236)   |
| MonthQuote_8    | 1.940***         | (0.371)   |
| Constant        | 21.17            | (15.65)   |
| Observations    | 65953            |           |
| $R^2$           | 0.686            |           |

Standard errors in parentheses

\*  $p < 0.05$ , \*\*  $p < 0.01$ , \*\*\*  $p < 0.001$

Table A7: Regression of the hourly number of quotes on several covariates, including Google Searches.

|                               | 1wk lag              |                      | 2wk lag               |                      | 4wk lag               |                      |
|-------------------------------|----------------------|----------------------|-----------------------|----------------------|-----------------------|----------------------|
|                               | (1)                  | (2)                  | (3)                   | (4)                  | (5)                   | (6)                  |
| Calls per Shift               | -0.109**<br>(0.0224) | -0.00140<br>(0.0496) | -0.0707**<br>(0.0238) | 0.0546<br>(0.0623)   | -0.0670**<br>(0.0254) | 0.0283<br>(0.0653)   |
| exper_cat=1                   | 0.781<br>(0.690)     | 3.665*<br>(1.743)    | 0.492<br>(0.675)      | 5.075*<br>(2.483)    | 0.589<br>(0.681)      | 3.822<br>(2.446)     |
| exper_cat=2                   | 0.626<br>(0.788)     | 4.083*<br>(1.850)    | 0.199<br>(0.779)      | 2.672<br>(2.736)     | -0.0300<br>(0.810)    | -0.156<br>(2.892)    |
| exper_cat=3                   | 0.808<br>(0.975)     | 3.505+<br>(1.974)    | 0.442<br>(0.960)      | 6.480*<br>(2.647)    | 0.271<br>(0.961)      | 5.798*<br>(2.664)    |
| exper_cat=4                   | 0.375<br>(1.032)     | 1.859<br>(2.380)     | -0.0252<br>(1.010)    | 4.135<br>(3.164)     | -0.100<br>(1.022)     | 4.990<br>(4.003)     |
| Male                          | -0.786<br>(0.527)    | -0.811<br>(0.539)    | -0.734<br>(0.519)     | -0.595<br>(0.524)    | -0.654<br>(0.524)     | -0.555<br>(0.532)    |
| Age 36-50                     | 0.699<br>(0.555)     | 0.785<br>(0.569)     | 0.568<br>(0.544)      | 0.572<br>(0.577)     | 0.544<br>(0.545)      | 0.458<br>(0.583)     |
| Age >50                       | 0.691<br>(0.540)     | 0.763<br>(0.553)     | 0.431<br>(0.535)      | 0.432<br>(0.559)     | 0.179<br>(0.551)      | 0.102<br>(0.578)     |
| deltaAgent_cat=1              | -0.506<br>(0.441)    | -0.530<br>(0.443)    | -0.654<br>(0.438)     | -0.765+<br>(0.449)   | -0.653<br>(0.447)     | -0.824+<br>(0.471)   |
| deltaAgent_cat=2              | -1.257*<br>(0.628)   | -1.340*<br>(0.641)   | -1.343*<br>(0.624)    | -1.220+<br>(0.631)   | -1.262*<br>(0.637)    | -1.200+<br>(0.649)   |
| Average call duration         | 0.00582<br>(0.00707) | 0.00689<br>(0.00705) | 0.00545<br>(0.00718)  | 0.00466<br>(0.00729) | 0.00619<br>(0.00738)  | 0.00437<br>(0.00760) |
| exper_cat=1 × Calls per Shift |                      | -0.135*<br>(0.0619)  |                       | -0.164*<br>(0.0746)  |                       | -0.118<br>(0.0777)   |
| exper_cat=2 × Calls per Shift |                      | -0.169*<br>(0.0718)  |                       | -0.0705<br>(0.0827)  |                       | 0.0159<br>(0.0908)   |
| exper_cat=3 × Calls per Shift |                      | -0.122<br>(0.0777)   |                       | -0.262**<br>(0.0964) |                       | -0.253*<br>(0.104)   |
| exper_cat=4 × Calls per Shift |                      | -0.0575<br>(0.0895)  |                       | -0.147<br>(0.119)    |                       | -0.223<br>(0.196)    |
| Constant                      | -1.892<br>(1.218)    | -4.433*<br>(1.909)   | -1.947<br>(1.293)     | -5.749*<br>(2.633)   | -1.976<br>(1.328)     | -4.467+<br>(2.556)   |
| AIC                           | 273.5                | 274.1                | 288.1                 | 285.3                | 279.1                 | 275.3                |
| BIC                           | 337.6                | 359.6                | 351.7                 | 370.1                | 342.1                 | 359.3                |
| N                             | 1543                 | 1543                 | 1480                  | 1480                 | 1403                  | 1403                 |

Standard errors in parentheses. +  $p < 0.1$ , \*  $p < 0.05$ , \*\*  $p < 0.01$

Table A8: Estimation results of the agent retention model, including all specification and control variables.
